# Supplementary material for: Genome-Wide Identification of Binding Sites for SmTCP7a Transcription Factors of Eggplant during Bacterial Wilt Resistance by ChIP-Seq
Source: MDPI journal article supplement (doi:10.3390/ijms23126844), 2022-06-20
Supplement: s1 [file s1]

Table S8 The primes used in the present study.

| Primer            | F 5'-3'                                    | R 5'-3'                                      |
|-------------------|--------------------------------------------|----------------------------------------------|
| qSmTCP<br>7a      | GCGAAACTCCAAACTTgCCCA<br>TA                | GGAAAGCGTTTACGGTCTGAG<br>GA                  |
| pTRV-2S<br>mTCP7a | CGCGTCTCGAGGCCCGGGAT<br>GGCGACGTTCGGTAGAAC | CTTCGGGACATGCCCGGGTAT<br>ACGTCTTCCTCTTCCATCA |
